# Supplementary material for: Spatiotemporal variability of light attenuation and net ecosystem metabolism in a back-barrier estuary
Source: Copernicus journal article supplement (doi:10.5194/os-16-593-2020), 2020-05-14
Supplement: Supplementary file 1 [file os-16-593-2020-supplement.pdf]

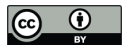

*Supplement of*

## **Spatiotemporal variability of light attenuation and net ecosystem metabolism in a back-barrier estuary**

**Neil K. Ganju et al.**

*Correspondence to:* Neil K. Ganju ([nganju@usgs.gov](mailto:nganju@usgs.gov))

The copyright of individual parts of the supplement might differ from the CC BY 4.0 License.

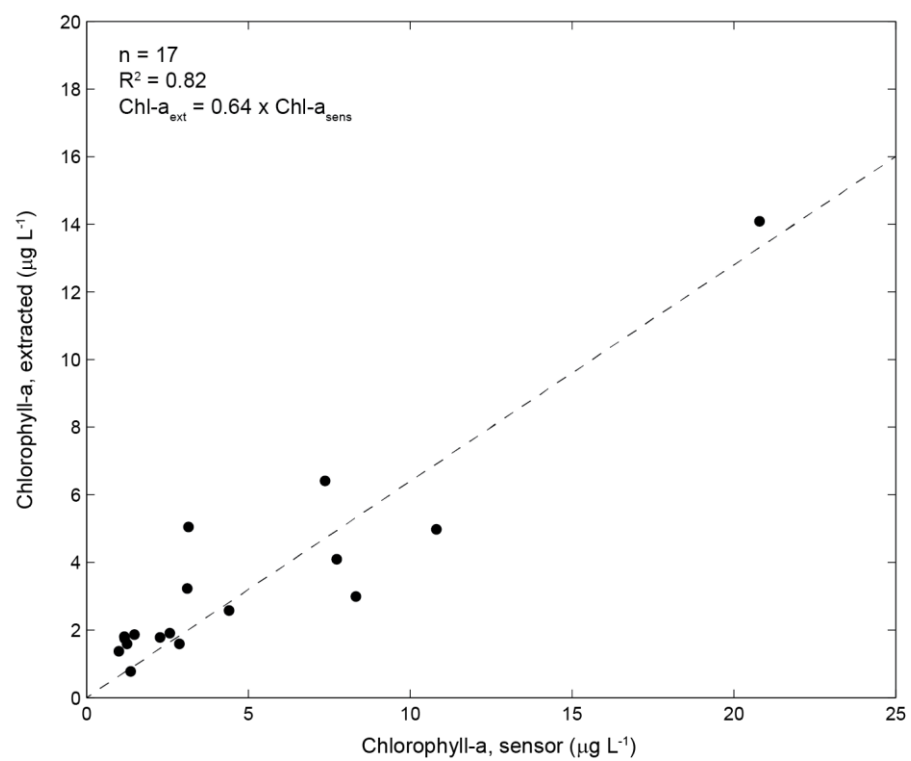

Supplementary Figure 1: Calibration of fluorescence-based chlorophyll-a to laboratory-measured, extraction-based chlorophyll-a.

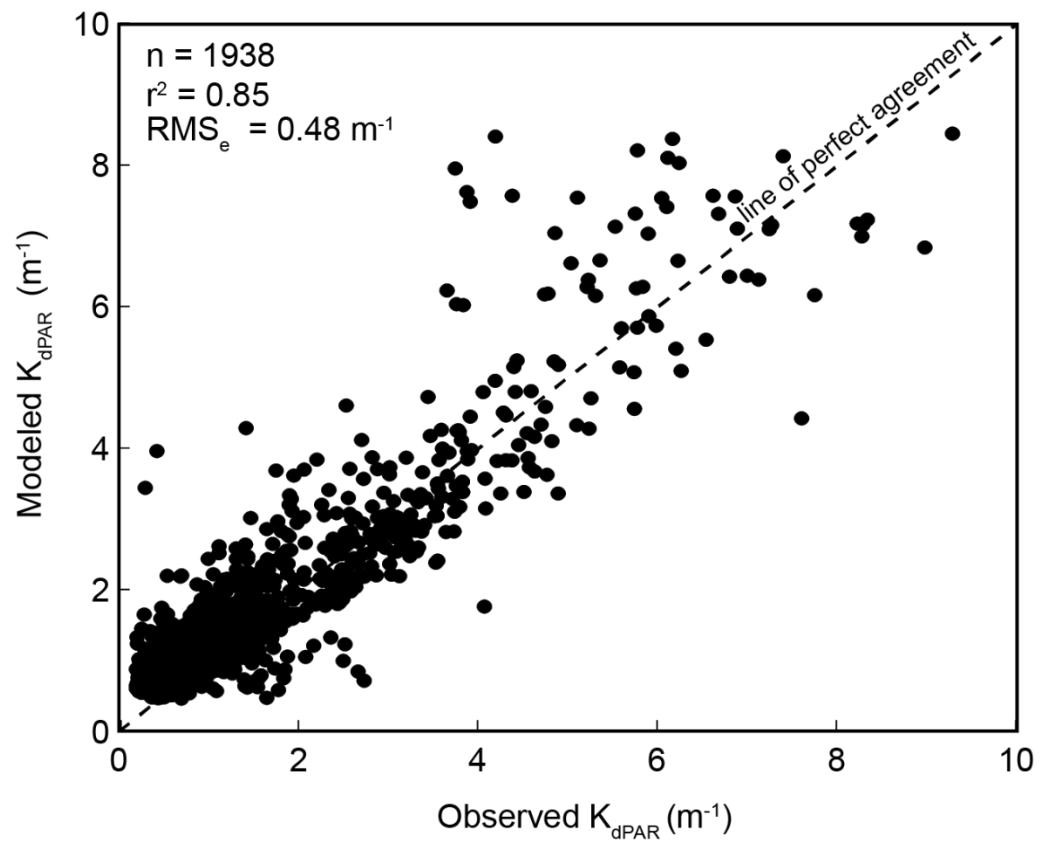

Supplementary Figure 2: Light model assessment, using 30 min averaged values.
